# Supplementary material
Source: PubMed Central journal article supplement (PMC3675927)
Supplement: AEM.00405-13_zam999104446so1.pdf [file AEM.00405-13_zam999104446so1.pdf]

**Table S1.** Oligonucleotide primers used in RT-qPCR.

| <b>Name<sup>a b</sup></b> | <b>Sequence (5' to 3')</b> |
|---------------------------|----------------------------|
| <i>alaS</i> 97F           | GATCCGACGCTTATGTTTCGT      |
| <i>alaS</i> 247R          | TGTAACCGACGTTGTCCAGA       |
| <i>boxA</i> 508F          | GTGCTCGAAGGTCAGTCCAT       |
| <i>boxA</i> 694R          | CCTTCAGGTCGCACAGGTAG       |
| <i>map</i> 620F           | GCATGTTCTTCACCATCGAG       |
| <i>map</i> 785R           | GCGGGAGAGAGGGTAAAGAT       |
| <i>pcaH</i> 167F          | AGGACAACGACCTGATCACC       |
| <i>pcaH</i> 333R          | TTCCTTCTTGTGGCGGTAAC       |
| <i>rpoC</i> 340F          | GCCCATATCTGGTTCCTCAA       |
| <i>rpoC</i> 498R          | TTCCTCTTCGGTCAGCATCT       |

- a.** the first three or four italicized letters represent the gene targeted.
- b.** suffixes F and R denote the forward and reverse primers, respectively.
