# Supplementary material
Source: PubMed Central journal article supplement (PMC3675927)
Supplement: AEM.00405-13_zam999104446so2.pdf [file AEM.00405-13_zam999104446so2.pdf]

**Table S2.** Stoichiometric reaction summaries with theoretical net ATP yields for different aerobic routes to degrade benzoate and *p*-hydroxybenzoate.<sup>e f</sup>

| Substrate                       | Pathway                                                                           | Expected Taxonomic Range <sup>a</sup>                   | Reactants                                                                                   | Key Intermediate(s)                                                               | Products                                                                                                                                     | ATP Yield <sup>d</sup> |
|---------------------------------|-----------------------------------------------------------------------------------|---------------------------------------------------------|---------------------------------------------------------------------------------------------|-----------------------------------------------------------------------------------|----------------------------------------------------------------------------------------------------------------------------------------------|------------------------|
| <b>Benzoate</b>                 | <b>Benzoyl-CoA (<i>box</i>)</b>                                                   | <b><i>Actinobacteria</i>,<br/><i>Proteobacteria</i></b> | <b>1 Benzoate + 2 CoA + <u>1 ATP</u> + 1 O<sub>2</sub> + 3 H<sub>2</sub>O</b>               | <b><u>1 Acetyl-CoA</u> + <u>1 Formate</u><sup>b</sup> + <u>1 Succinyl-CoA</u></b> | <b>1 AMP + 1 H<sup>+</sup> + 1 PPi + <u>1 NADH</u></b>                                                                                       | <b>23</b>              |
| Benzoate                        | β-Ketoadipate, Catechol ( <i>cat</i> ) Branch ( <i>ortho</i> -cleavage)           | Fungi, <i>Proteobacteria</i>                            | 1 Benzoate + 1 CoA + 2 O <sub>2</sub> + 1 H <sub>2</sub> O                                  | <u>1 Acetyl-CoA</u> + <u>1 Succinate</u>                                          | 1 CO <sub>2</sub> + 1 H <sup>+</sup>                                                                                                         | 17                     |
| Benzoate                        | β-Ketoadipate, Protocatechuate ( <i>pca</i> ) Branch ( <i>ortho</i> -cleavage)    | <i>Bacteria</i>                                         | 1 Benzoate + 1 CoA + 3 O <sub>2</sub> + <u>2 NADPH</u>                                      | <u>1 Acetyl-CoA</u> + <u>1 Succinate</u>                                          | 2 NADP <sup>+</sup> + 1 H <sub>2</sub> O                                                                                                     | 11                     |
| Benzoate                        | Catechol I ( <i>meta</i> -cleavage)                                               | <i>Actinobacteria</i> , <i>Proteobacteria</i>           | 1 Benzoate + 1 CoA + 2 O <sub>2</sub> + 2 H <sub>2</sub> O + 1 NAD <sup>+</sup>             | <u>1 Acetyl-CoA</u> + <u>1 Formate</u> + <u>1 Pyruvate</u> <sup>c</sup>           | 1 CO <sub>2</sub> + 2 H <sup>+</sup> + <u>1 NADH</u>                                                                                         | 33                     |
| Benzoate                        | Catechol II ( <i>meta</i> -cleavage)                                              | <i>Actinobacteria</i> , <i>Proteobacteria</i>           | 1 Benzoate + 1 CoA + 2 O <sub>2</sub> + 2 H <sub>2</sub> O + 2 NAD <sup>+</sup>             | <u>1 Acetyl-CoA</u> + <u>1 Pyruvate</u>                                           | 2 CO <sub>2</sub> + 2 H <sup>+</sup> + <u>2 NADH</u>                                                                                         | 33                     |
| Benzoate                        | Protocatechuate ( <i>meta</i> -cleavage)                                          | <i>Proteobacteria</i>                                   | 1 Benzoate + 3 O <sub>2</sub> + <u>1 NADPH</u>                                              | <u>2 Pyruvate</u>                                                                 | 1 CO <sub>2</sub> + 1 NADP <sup>+</sup>                                                                                                      | 27                     |
| <b><i>p</i>-Hydroxybenzoate</b> | <b>β-Ketoadipate, Protocatechuate (<i>pca</i>) Branch (<i>ortho</i>-cleavage)</b> | <b><i>Bacteria</i></b>                                  | <b>1 POB + 1 CoA + 2 O<sub>2</sub> + <u>1 NADPH</u></b>                                     | <b><u>1 Acetyl-CoA</u> + <u>1 Succinate</u></b>                                   | <b>2 CO<sub>2</sub> + 1 H<sup>+</sup> + 1 NADP<sup>+</sup> + 1 H<sub>2</sub>O + <u>2 FADH<sub>2</sub></u> + <u>4 NADH</u> + <u>1 GTP</u></b> | <b>14</b>              |
| <i>p</i> -Hydroxybenzoate       | Protocatechuate ( <i>meta</i> -cleavage)                                          | <i>Proteobacteria</i>                                   | 1 POB + 2 O <sub>2</sub> + 1 H <sub>2</sub> O + <u>1 NADPH</u>                              | <u>2 Acetyl-CoA</u> + <u>2 Pyruvate</u>                                           | 7 CO <sub>2</sub> + 3 H <sup>+</sup> + <u>2 FADH<sub>2</sub></u> + <u>8 NADH</u> + <u>2 GTP</u>                                              | 30                     |
| <i>p</i> -Hydroxybenzoate       | Protocatechuate ( <i>para</i> -cleavage)                                          | Bacilli                                                 | 1 POB + 1 CoA + 2 O <sub>2</sub> + 1 H <sub>2</sub> O + <u>1 NADPH</u> + 2 NAD <sup>+</sup> | <u>2 Acetyl-CoA</u> + <u>1 Pyruvate</u>                                           | 7 CO <sub>2</sub> + 2 H <sup>+</sup> + <u>2 FADH<sub>2</sub></u> + <u>9 NADH</u> + <u>2 GTP</u>                                              | 33                     |

a. Retrieved from <http://www.biocyc.org>

b. Formate dehydrogenation yields 1 NADH.

c. Pyruvate dehydrogenation yields 1 Acetyl-CoA and 1 NADH.

d. Net ATP yields per molecule of substrate were calculated from the underlined products going through the TCA cycle using 3 ATP/NAD(P)H, 2 ATP/FADH<sub>2</sub>, 1 ATP/GTP.

e. *box* and *pca* pathways present in E-37 are bolded.

f. Underlined compounds were used for energy calculations.
