# Supplementary material
Source: PubMed Central journal article supplement (PMC3675927)
Supplement: AEM.00405-13_zam999104446so3.pdf [file AEM.00405-13_zam999104446so3.pdf]

### Supplementary Figure Legends (Gulvik & Buchan)

**Fig. S1.** Linear regression of temporally paired POB and benzoate concentrations derived from Figure 2 of *S. stellata* E-37 during simultaneous catabolism. Error bars represent the standard deviation of triplicate technical replicates.

**Fig. S2.** Gene neighborhoods of *pob* and *pca* operons from representative taxa. All neighborhoods are centered around *pcaHG* and drawn to scale. Each color represents a unique COG number (with the exception of PcaG and PcaH): PobA (COG0654), PcaH (COG3485), PcaG (COG3485), PcaB (COG0015), PcaC (COG0599), PcaD (COG0596), PcaK (COG2271), AraC-type PobR (COG2207), IclR-type PobR (COG1414), LysR-type PcaQ (COG0583) and conserved hypothetical protein [CHP] in *Roseobacter* (COG3246).

**Fig. S3.** Simultaneous catabolism of benzoate and POB by (A) *R. pomeroyi* DSS-3 and preferential POB consumption by (B) *V. paradoxus* EPS. Error bars for O.D. and substrate concentrations represent the standard deviation of biological replicates (n = 3) for each. O.D., Optical Density.

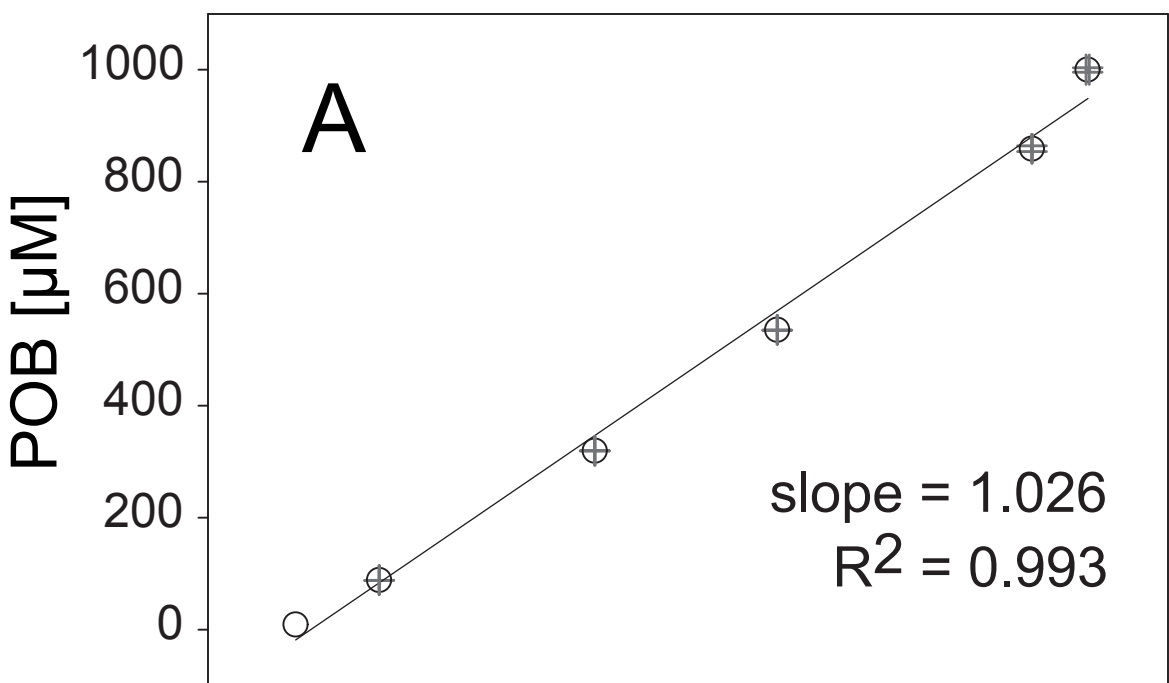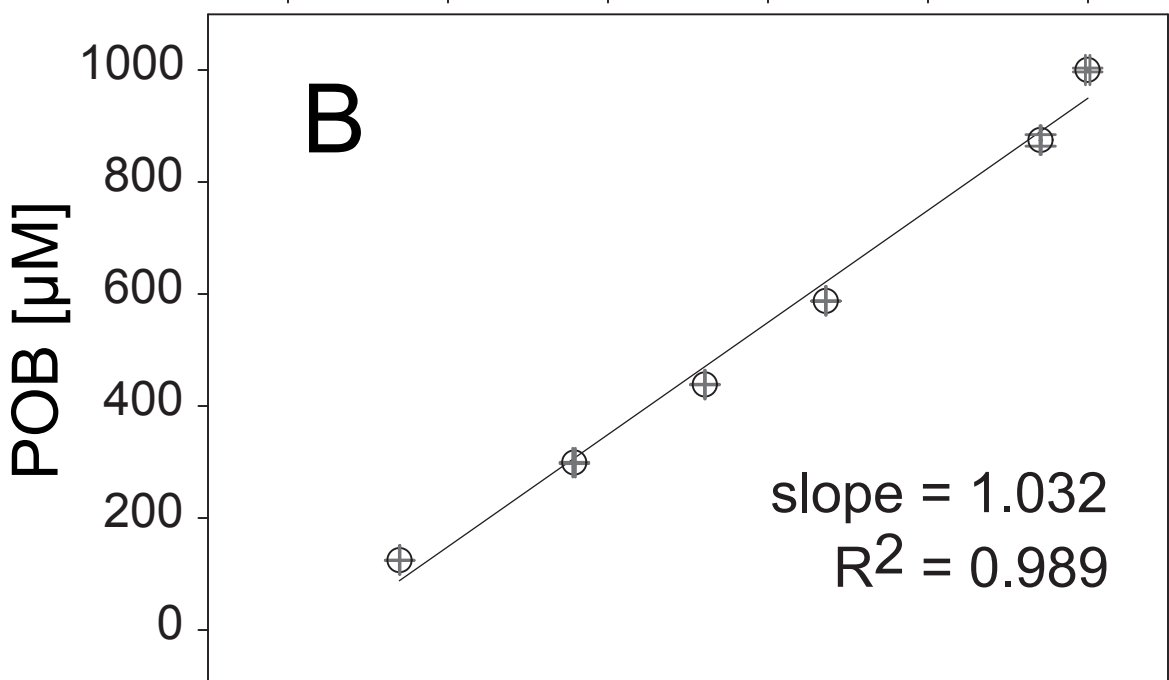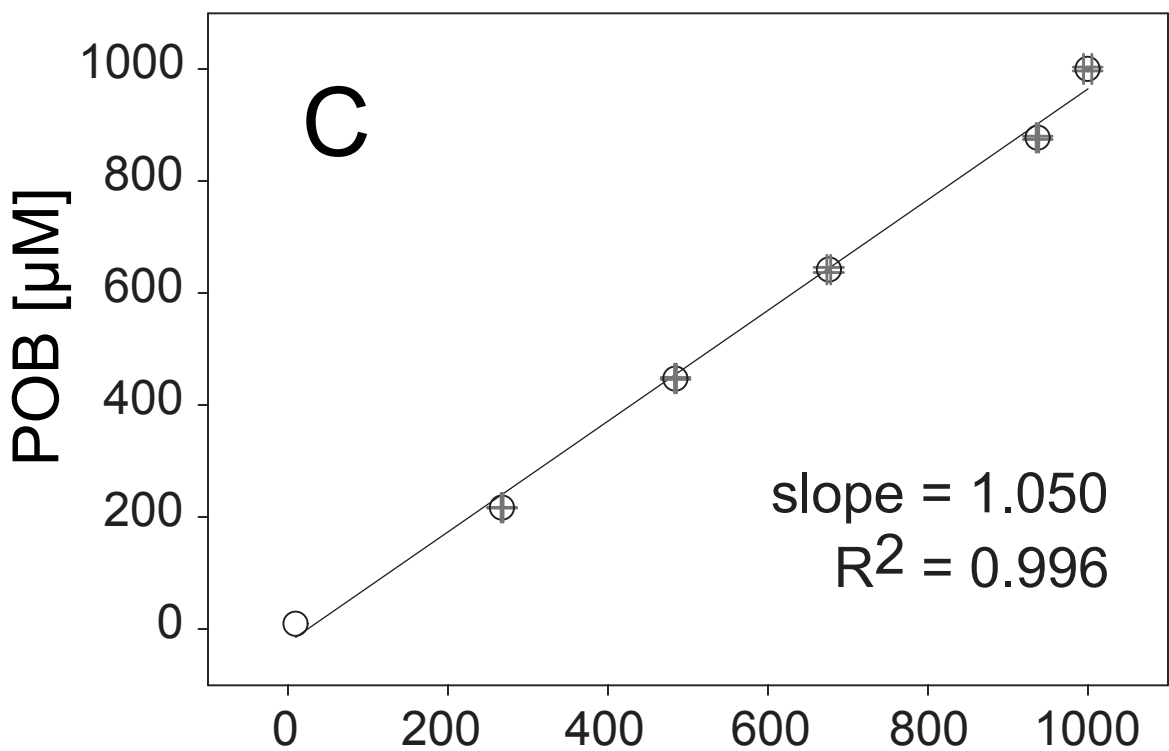

Fig. S1

Benzoate [ $\mu\text{M}$ ]

# Fig. S2

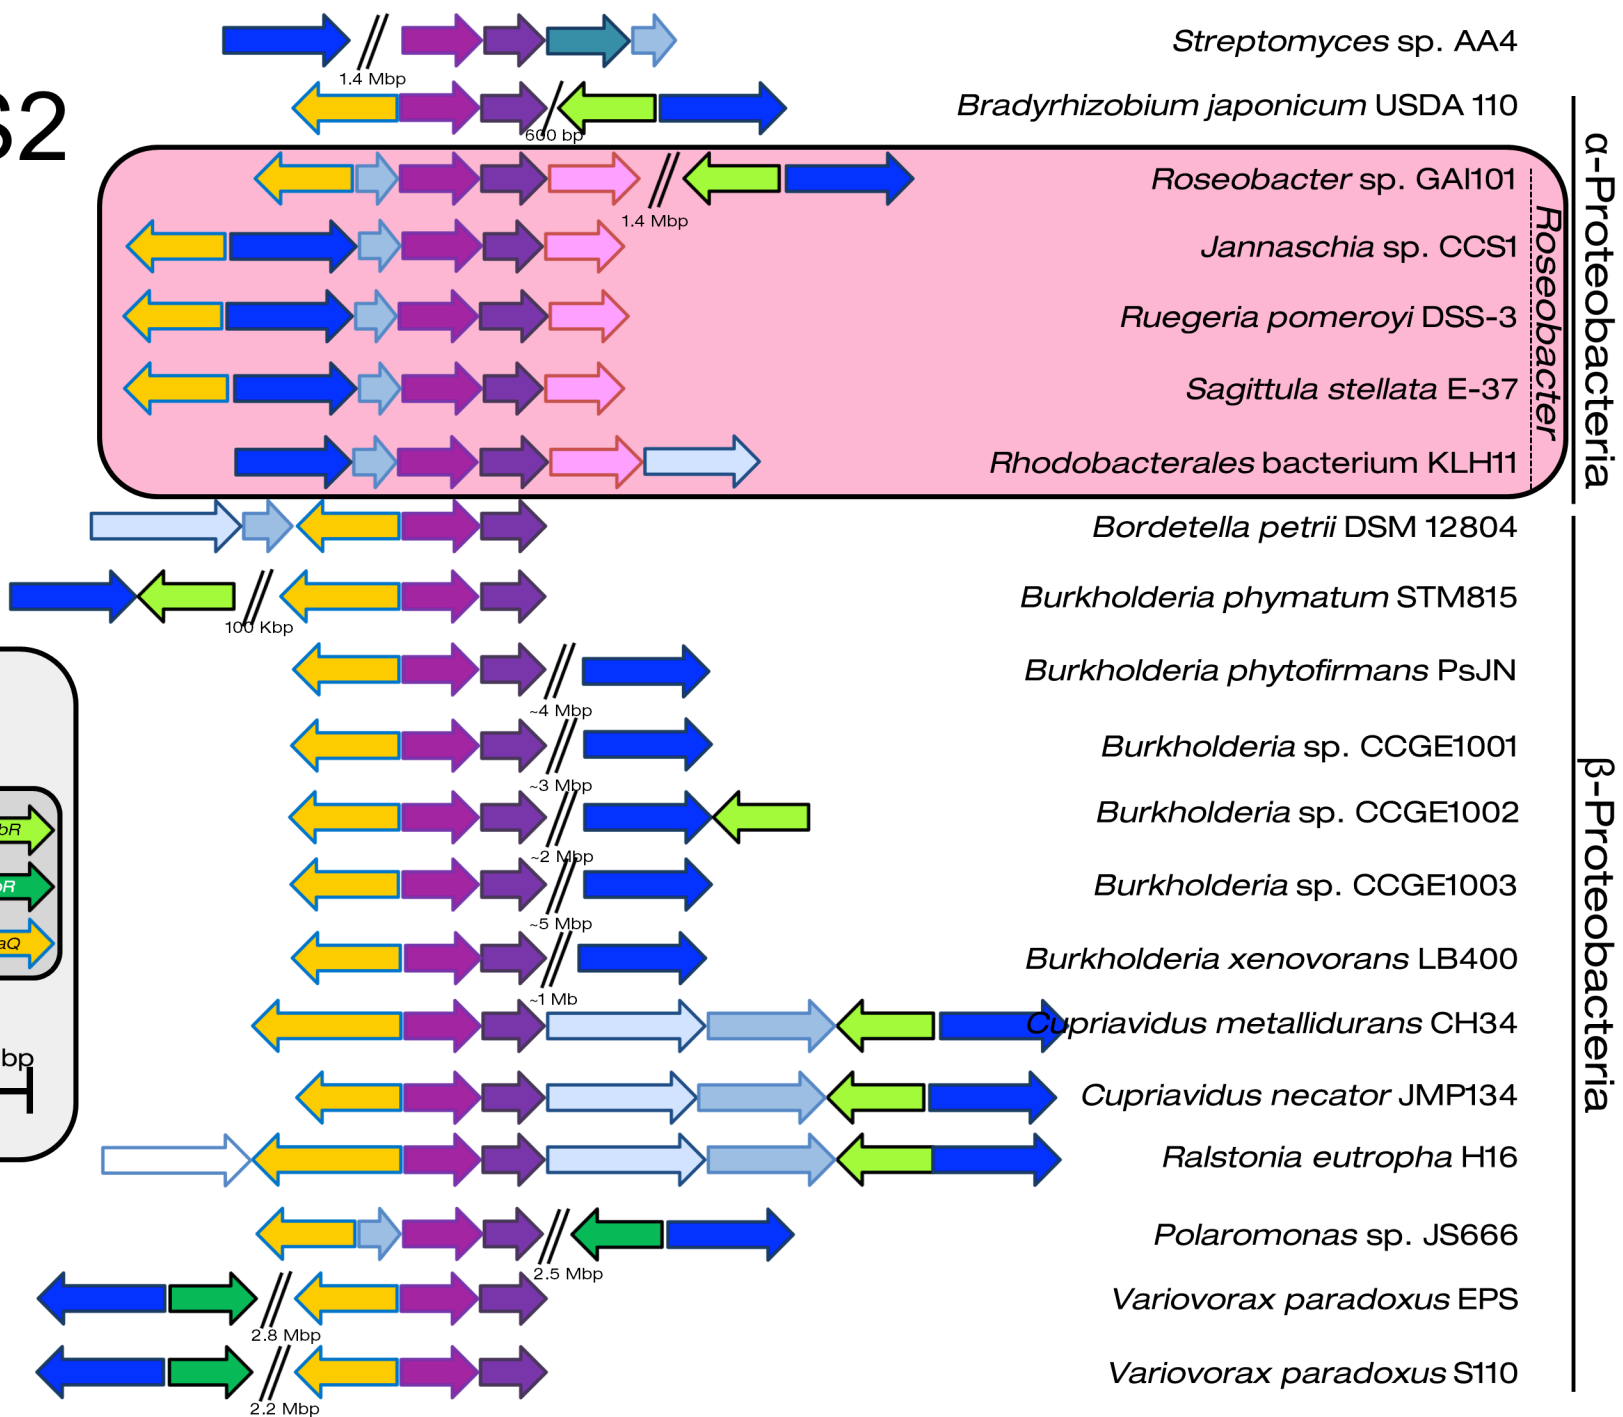

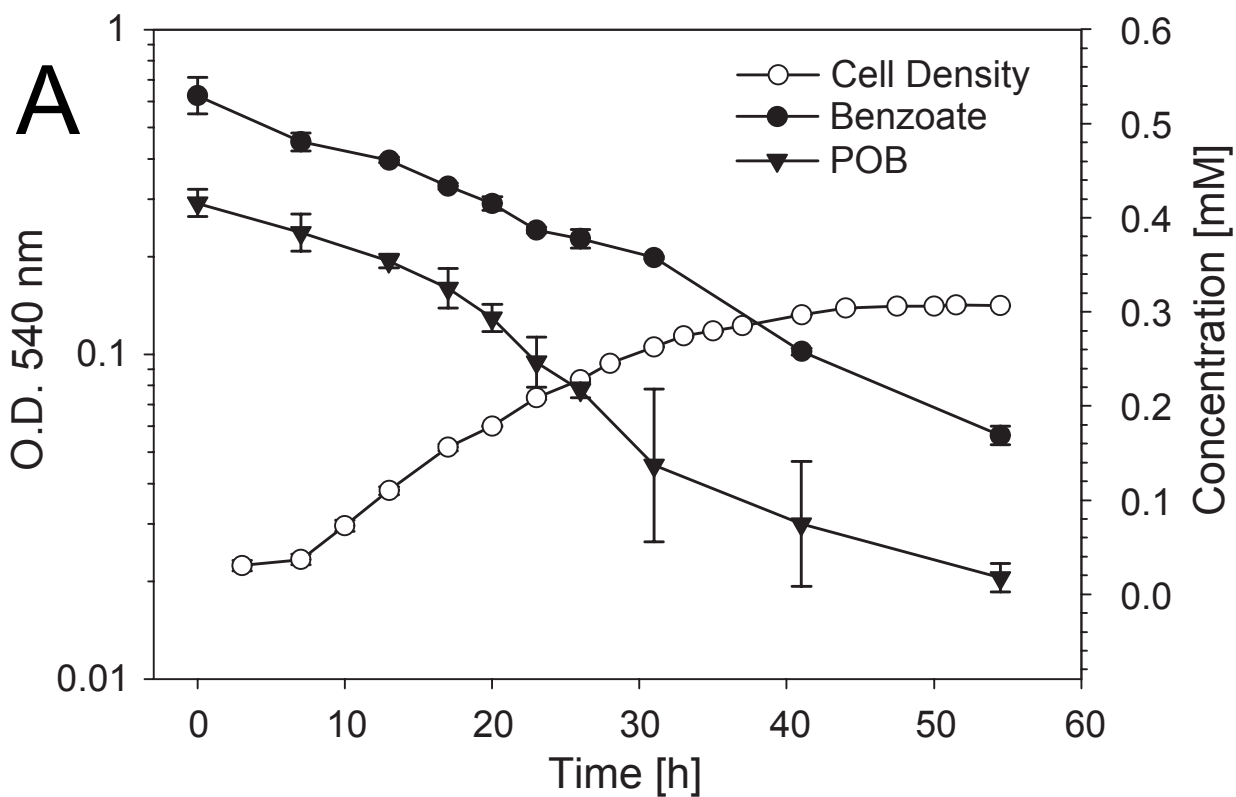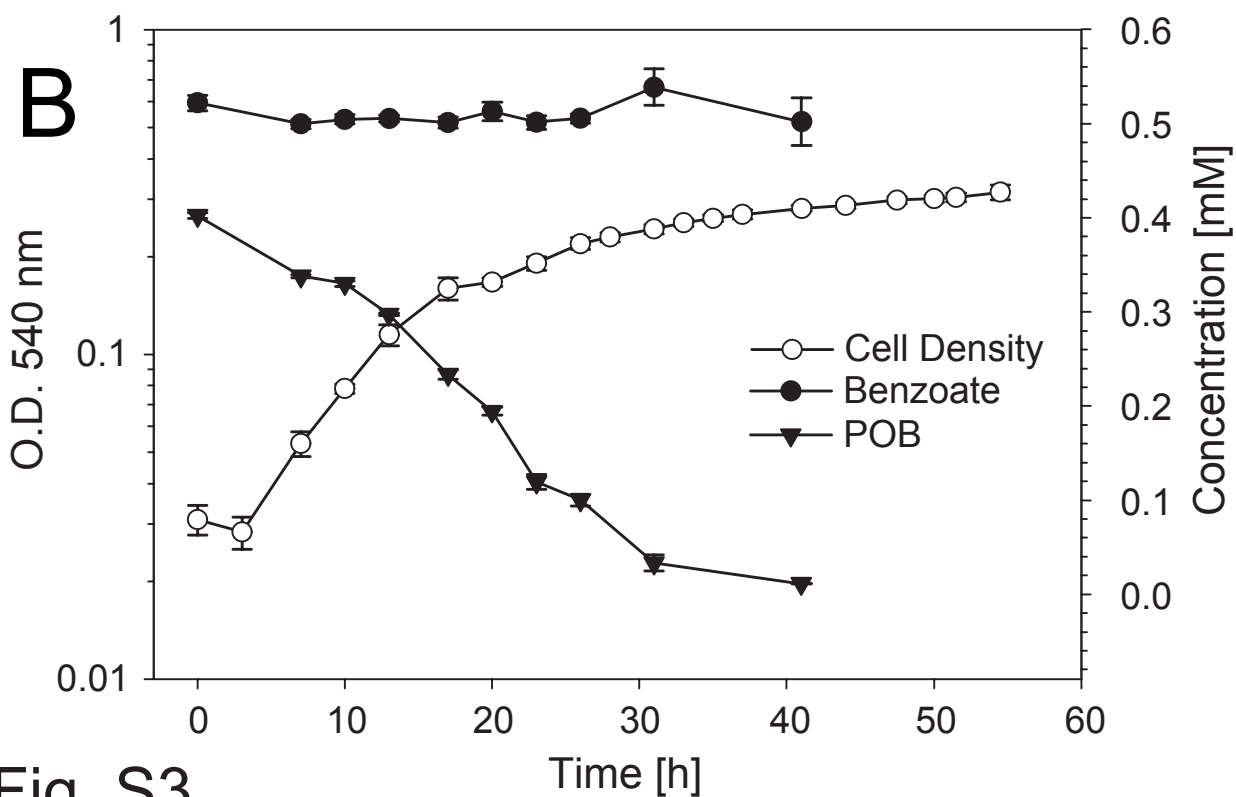

Fig. S3
